# Supplementary material for: Vermicompost Amended With Rock Phosphate as a Climate Smart Technology for Production of Organic Swiss Chard (Beta vulgaris subsp. vulgaris)
Source: Frontiers journal article supplement (doi:10.3389/fsufs.2022.757792), 2022-02-16
Supplement: Data_Sheet_1.pdf [file Data_Sheet_1.pdf]

## Supplementary figures and tables

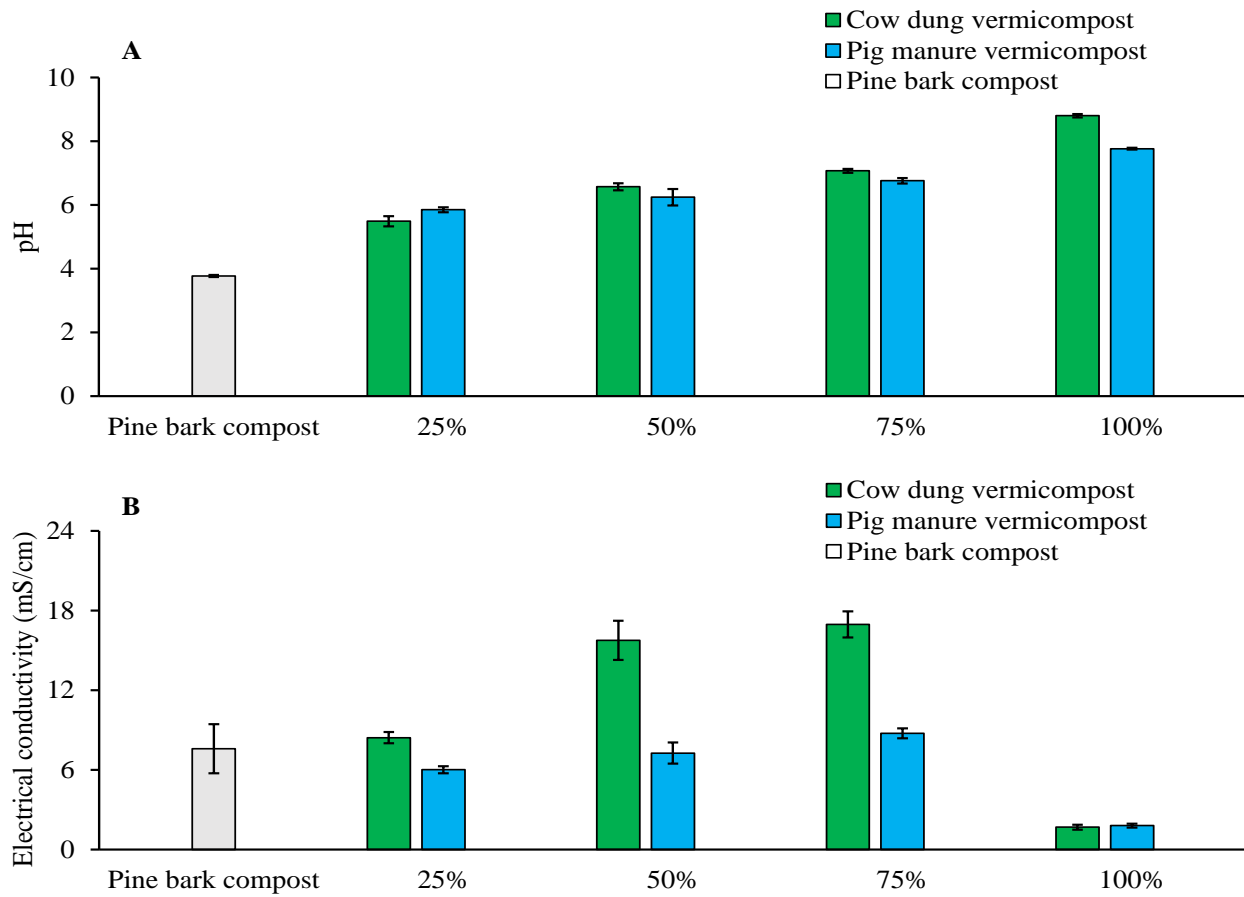

**Fig. SM1.** pH and EC content of planting media made with pine bark compost incorporated with RP cow and pig manure vermicompost. Error bars represent standard deviations.

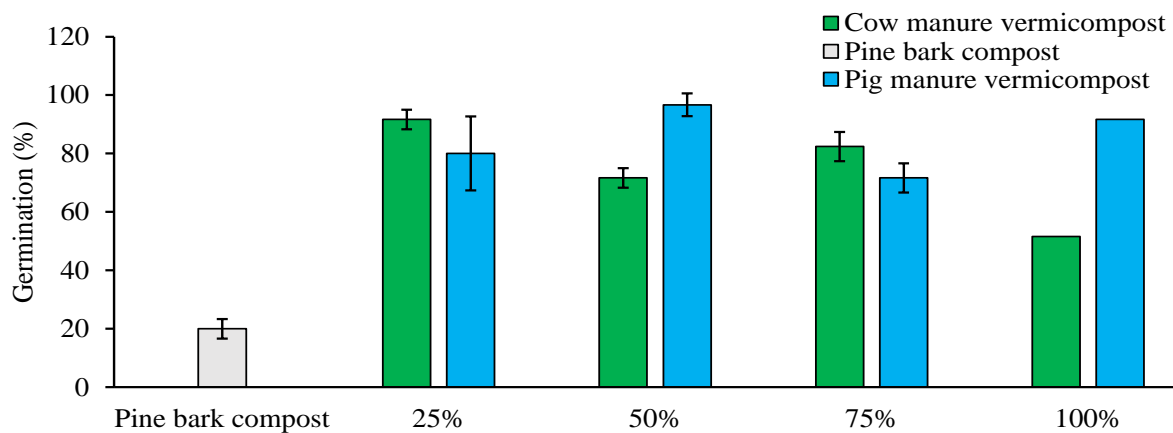

**Fig. SM2.** Germination percentage of Swiss chard seedlings grown in the planting media made with pine bark compost incorporated with RP cow manure and pig manure vermicompost. Error bars represent standard deviations.

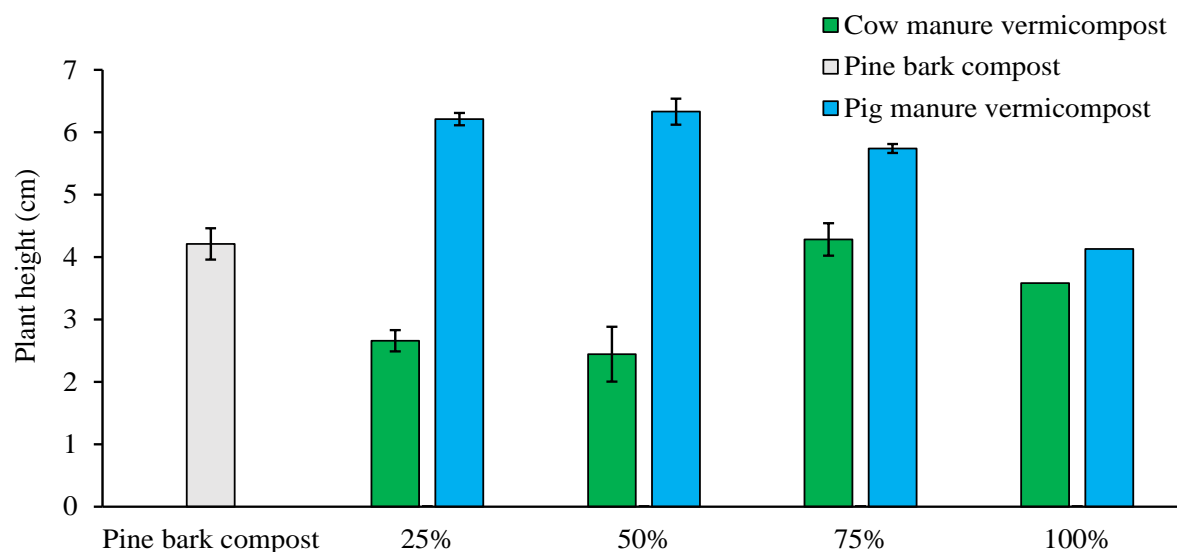

**Fig. SM3.** Plant height of Swiss chard seedlings grown in the planting media made with pine bark compost incorporated with RP amended cow and pig manure vermicompost at week 4 after germination. Error bars represent standard deviations.

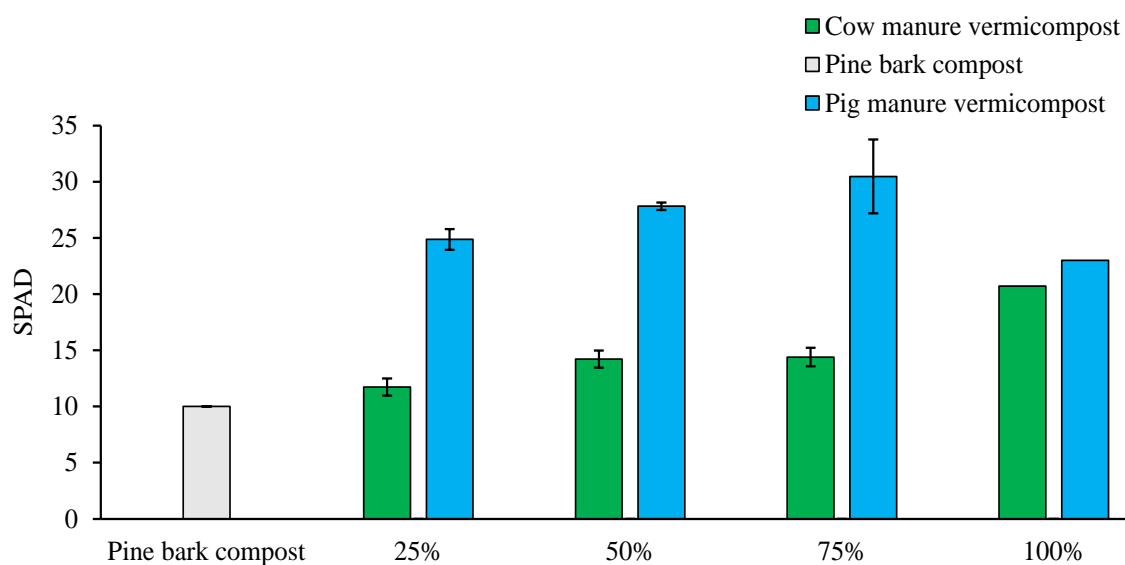

**Fig. SM4.** Chlorophyll content measured in SPAD units of Swiss chard seedlings grown in the planting media made with pine bark compost substituted with different levels of cow and pig manure vermicompost at week 4 after germination. Error bars represent standard deviations.

**Table SM1:** Analysis of variance for the various parameters measured during the seedling stage after substitution of pine bark with varying levels of cow or pig manure vermicompost.

| Source Variation       | pH       | EC (mS/cm) | Germination (%) | Plant height (cm) | SPAD     |
|------------------------|----------|------------|-----------------|-------------------|----------|
| Vermicompost type (V)  | < 0.0001 | < 0.0001   | 0.0003          | < 0.0001          | < 0.0001 |
| Substitution level (S) | < 0.0001 | < 0.0001   | < 0.0001        | < 0.0001          | < 0.0001 |
| V × S                  | < 0.0001 | < 0.0001   | < 0.0001        | < 0.0001          | < 0.0001 |

Table SM2: The effect of cow and pig manure RP enriched vermicompost on fertility status of post-harvest soil of Swiss chard

| Treatments                  | EC (mS cm <sup>-1</sup> ) |      | Available nutrients (mg kg <sup>-1</sup> ) |                    |                    | Exchangeable nutrients (mg kg <sup>-1</sup> ) |        |       |         | DTPA extractable (mg kg <sup>-1</sup> ) |        |         |           |
|-----------------------------|---------------------------|------|--------------------------------------------|--------------------|--------------------|-----------------------------------------------|--------|-------|---------|-----------------------------------------|--------|---------|-----------|
|                             | pH                        | EC   | Bray 1                                     | NH <sub>4</sub> -N | NO <sub>3</sub> -N | Ca                                            | Mg     | Na    | K       | Cu                                      | Zn     | Cr      | Pb        |
| Ferralsol soil              | 5.5a                      | 2.2a | 3.98e                                      | 73.95a             | 36.24ab            | 207.70a                                       | 7.25c  | 5.43a | 68.94a  | 0.0540bcd                               | 0.038a | 0.0004a | 0.1130a   |
| 25 mg P kg <sup>-1</sup> VC | 6.0a                      | 2.0a | 35.47ab                                    | 30.90d             | 30.28abc           | 1387.44c                                      | 28.14a | 5.40a | 46.74b  | 0.1071a                                 | 0.040a | 0.0009a | 0.0405b   |
| 50 mg P kg <sup>-1</sup> VC | 6.0a                      | 1.7a | 24.20cd                                    | 39.71bc            | 22.48c             | 231.40bc                                      | 18.51b | 6.05a | 70.13a  | 0.0775abc                               | 0.05a  | 0.0007a | 0.0268bcd |
| 25 mg P kg <sup>-1</sup> VP | 6.0a                      | 2.2a | 31.50bc                                    | 32.40d             | 23.85c             | 400.43bc                                      | 18.30b | 5.64a | 31.90bc | 0.1026ab                                | 0.04a  | 0.0007a | 0.0329bc  |
| 50 mg P kg <sup>-1</sup> VP | 5.5a                      | 2.0a | 41.90a                                     | 32.49d             | 26.61bc            | 196.00b                                       | 28.23a | 5.40a | 35.26bc | 0.0331cd                                | 0.01b  | 0.0006a | 0.0184cde |
| 25 mg P kg <sup>-1</sup> RP | 5.3a                      | 2.1a | 15.93d                                     | 36.13cd            | 22.02c             | 729.72c                                       | 5.96c  | 5.30a | 27.23c  | 0.0200d                                 | 0.00b  | 0.0005a | 0.0066e   |
| 50 mg P kg <sup>-1</sup> RP | 5.1a                      | 1.9a | 3.52e                                      | 44.54b             | 39.91a             | 125.30c                                       | 6.40c  | 5.26a | 29.21c  | 0.0828ab                                | 0.005b | 0.0005a | 0.0119de  |

Note\*: VC= cow manure RP vermicompost, VP= pig manure vermicompost, Initial soil fertility parameters are presented in Table 1. Significantly different numbers for the same parameter are followed by different letters based on LSD ( $p \leq 0.05$ ).
